# Supplementary material for: Formaldehyde-assisted hydrothermal synthesis of one-dimensional CeO2 and their morphology-dependent properties
Source: Royal Society of Chemistry journal article supplement (doi:10.1039/c2ce25644d), 2012-01-01
Supplement: c2ce25644d.pdf [file c2ce25644d.pdf]

## Supplementary Material (ESI)

# Formaldehyde-assisted hydrothermal synthesis of one-dimensional CeO<sub>2</sub> and their morphology-dependent properties

Richuan Rao, Qingyun Zhang, Huade liu, Ming Yang, Qiang Ling and Aimin Zhang\*

*s* Key Laboratory of Mesoscopic Chemistry of MOE, School of Chemistry and Chemical Engineering, Nanjing University, Nanjing, 210093, PR China.

10

15

20

25

30

35

40

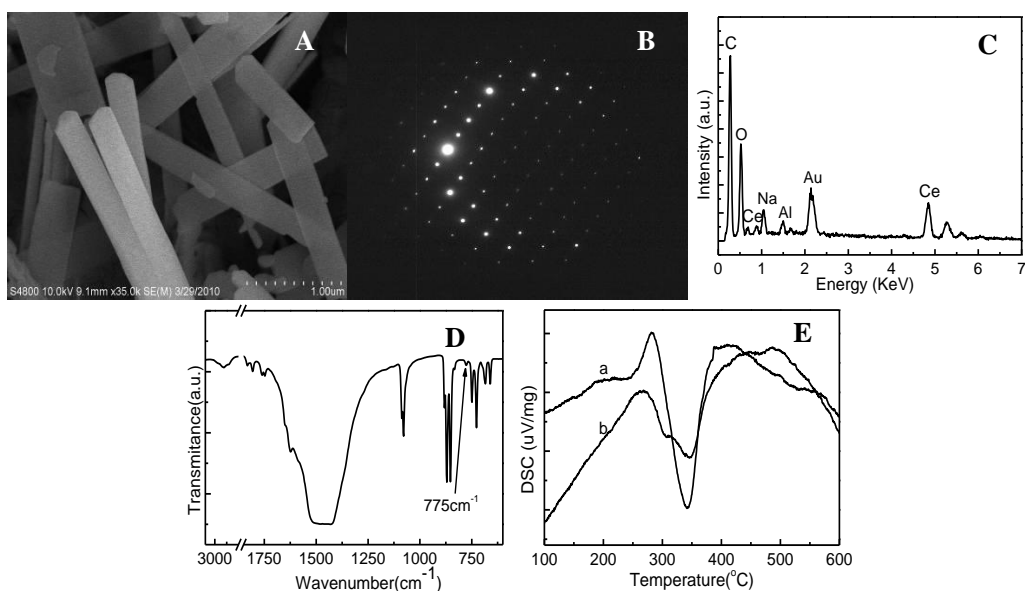

Figure S1 (A) SEM image (B) SAED pattern; (C) EDS spectrum; (D) FT-IR spectra of CeO<sub>2</sub> nanobelt precursors; (E) DSC curves of cerium formate (a) and CeO<sub>2</sub> nanobelt precursors (b).

45

50

55

60

65

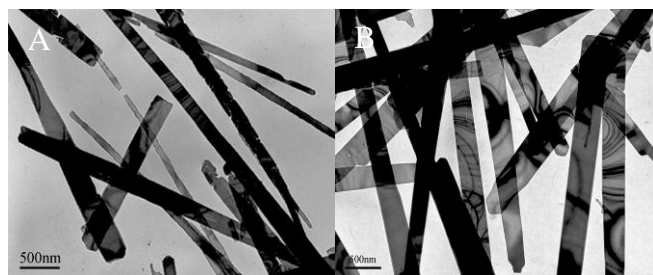

5 Fig.S2 TEM images of CeO<sub>2</sub> beltlike precursors. (A) NaOH: 1.5g; Temperature: 120°C; Time: 20h. (B) NaOH: 1g; Temperature: 140°C; Time: 40h.

10

15

20

25

30

35

40

45

50

**Table S1** Summary of synthetic CeO<sub>2</sub> precursors using different hydrothermal conditions

|      | Alkali (g) | Ce(NO <sub>3</sub> ) <sub>3</sub> ·6H <sub>2</sub> O(g) | Na(K)/Ce molar ratio | Hydrothermal temperature (°C) | Hydrothermal time (h) | Morphology of precursors | Phase                   |
|------|------------|---------------------------------------------------------|----------------------|-------------------------------|-----------------------|--------------------------|-------------------------|
| NaOH | 1          | 1                                                       | 10.8                 | 120                           | 20                    | Nanorod                  | Ce(HCOO) <sub>3</sub>   |
|      | 1.5        | 1                                                       | 16.3                 | 100                           | 20                    | Nanorod                  | Ce(HCOO) <sub>3</sub>   |
|      | 1.5        | 1                                                       | 16.3                 | 120                           | 20                    | Nanobelt                 |                         |
|      | 1.5        | 1                                                       | 16.3                 | 140                           | 20                    | Nanobelt                 |                         |
|      | 1.5        | 1                                                       | 16.3                 | 180                           | 20                    | Not forming              |                         |
|      | 0.3        | 1                                                       | 3.3                  | 140                           | 40                    | Nanorod                  | Ce(HCOO) <sub>3</sub>   |
|      | 1          | 1                                                       | 10.8                 | 140                           | 40                    | Nanobelt                 |                         |
|      | 1.5        | 1                                                       | 16.3                 | 140                           | 40                    | Nanobelt                 |                         |
|      | 2          | 1                                                       | 21.6                 | 140                           | 40                    | Nanobelt                 |                         |
|      | 3          | 1                                                       | 32.4                 | 140                           | 40                    | Nanobelt (Broken)        |                         |
|      | 1          | 3                                                       | 3.6                  | 140                           | 40                    | Nanorod                  | Ce(HCOO) <sub>3</sub>   |
|      | 1          | 4                                                       | 2.7                  | 140                           | 40                    | Nanorod                  | Ce(HCOO) <sub>3</sub>   |
| KOH  | 2.1        | 1                                                       | 16.3                 | 120                           | 20                    | Nanowires                | Ce (CO <sub>3</sub> )OH |
